# Supplementary material for: Reducing Sedentary Behavior and Promoting Physical Activity in Medical Students: Protocol of the PROMESS-Physical Activity Clinical Trial
Source: Research Square preprint supplement (doi:10.21203/rs.3.rs-7441836/v1), 2025-11-05
Supplement: Supplementary file 1 [file 7c06486ea9fa34e82f852c54.docx]

| **Table 1 | PROMESS-Physical Activity trial registration data** | |
| --- | --- |
| **Data category** | **Information** |
| Primary registry and trial identifying number | ClinicalTrials.gov: NCT06297304 |
| Date of registration in primary registry | 29 February, 2024 |
| Secondary identifying numbers | IRB: 2023-07-04-01 |
| Source(s) of monetary or material support | Contribution of student and campus life of the Claude Bernard University Lyon 1:  *Grant number 22CVEC_SAN* |
| Primary sponsor | Research on Healthcare Performance Lab U1290 |
| Contact for public queries | SS, AM |
| Contact for scientific queries | SS, AM |
| Public title | Preventive Remediation of sedentary behavior and physical activity for Optimal MEdical StudentS |
| Scientific title | Determining the influence of an intervention based on sedentary behavior reduction and physical activity promotion among medical students’: the protocol of the PROMESS-Physical Activity clinical trial |
| Countries of recruitment | France |
| Health condition(s) or problem(s) studied | Sedentary behavior and Physical Activity in medical students |
| Intervention(s) | Sedentary behavior reduction and physical activity promotion program |
| Key inclusion and exclusion criteria | Ages eligible for study: >18 years; Sexes eligible for study: both;  Accepts healthy volunteers: yes  No relevant concomitant care and interventions will be prohibited during the trial |
| Inclusion criteria: 4th and 5th years undergraduate students of the Lyon-Est Faculty of Medicine |
| No exclusion criteria |
| Study type | Interventional |
| Allocation: randomized;  Intervention model: single group;  Masking: NA |
| Primary purpose: prevention |
| Target sample size | 45 |
| Primary outcome | Changes in scores on the sedentary time (measured by RPAQ, GPAQ and accelerometry) |
| Key secondary outcomes | Changes in various aspect of other sedentary behavior, physical fitness, physical activity levels and body composition markers  Moderators of efficacy and composite score of student’s satisfactions |

**Additional file 1. PROMESS-Physical Activity trial registration data**
