# Supplementary material for: Reducing Sedentary Behavior and Promoting Physical Activity in Medical Students: Protocol of the PROMESS-Physical Activity Clinical Trial
Source: Research Square preprint supplement (doi:10.21203/rs.3.rs-7441836/v1), 2025-11-05
Supplement: Supplementary file 2 [file adb52dceb38414edae7e9b01.docx]

**Additional file 7.** Table of secondary outcomes.

**Table 1.** *Secondary outcomes.*

| VAS | Sedentary behavior | Scores changes (S1, S2, S3) |
| --- | --- | --- |
| Physical activity | Scores changes (S1, S2, S3) |
| Physical fitness | Scores changes (S1, S2, S3) |
| GPAQ | Scores of physical activity levels | Scores changes (S1, S2, S3) |
| Accelerometry | Sedentary bouts | Score changes (Baseline, S1-S2, S2-S3) |
| Light Physical Activity | Score changes (Baseline, S1-S2, S2-S3) |
| Moderate-to-vigorous Physical Activity | Score changes (Baseline, S1-S2, S2-S3) |
| Steps | Score changes (Baseline, S1-S2, S2-S3) |
| Critical Dynamic Body Acceleration | Score changes (Baseline, S1-S2, S2-S3) |
| Body composition | Body Mass Index | Scores changes (S1, S2, S3) |
| Fat mass | Scores changes (S1, S2, S3) |
| Fat-free mass | Scores changes (S1, S2, S3) |
| Skeletal muscle mass | Scores changes (S1, S2, S3) |
| Bone mineral content | Scores changes (S1, S2, S3) |
| Fat-free mass hydration | Scores changes (S1, S2, S3) |
| Phase angle | Scores changes (S1, S2, S3) |
| Impedance ratio | Scores changes (S1, S2, S3) |

GPAQ: Global Physical Activity Questionnaire; S1: session 1; S2: session 2; S3: session 3; VAS; Visual Analog Scale
